# Supplementary material
Source: HighWire-hosted journal article supplement (https://bibliotheek.ehb.be:2666/highwire/filestream/164530/field_highwire_adjunct_files/1/bmjqs-2024-017385supp002_data_supplement.pdf)
Supplement: bmjqs-2024-017385supp002_data_supplement.pdf [file bmjqs-2024-017385supp002_data_supplement.pdf]

## Supplementary File 2

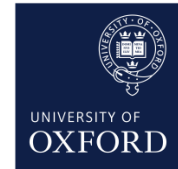

## Supplementary File 2: Adaptive Strategies in ICU - NVivo Codebook

This file shows the code book used for analysing the interviews. The code book is based on the taxonomy of pressures and strategies previously published in *Page B, Irving D, Amalberti R, et al. Health services under pressure: a scoping review and development of a taxonomy of adaptive strategies. BMJ Quality & Safety Published Online First: 29 November 2023.*

| Name                                 | Description | Files | References |
|--------------------------------------|-------------|-------|------------|
| <b>Context</b>                       |             | 1     | 1          |
| About the interviewee                |             | 20    | 65         |
| Descriptions of the clinical setting |             | 17    | 46         |
| <b>Pressures</b>                     |             | 4     | 5          |
| <u>Demand exceeding capacity</u>     |             | 7     | 8          |
| Patient demand                       |             | 1     | 1          |
| High patient acuity                  |             | 16    | 40         |
| High volume of patients              |             | 10    | 15         |

## Supplementary File 2

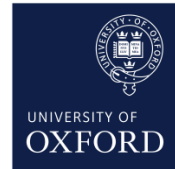

| Name                                                       | Description                                     | Files | References |
|------------------------------------------------------------|-------------------------------------------------|-------|------------|
| Patients' and families' concerns & expectations            |                                                 | 5     | 11         |
| Resource pressures                                         |                                                 | 1     | 1          |
| Lack of space or space not fit for purpose                 |                                                 | 12    | 24         |
| Shortage of bed availability                               |                                                 | 11    | 17         |
| Shortage of medications, supplies, equipment               |                                                 | 4     | 8          |
| Shortage of staff numbers eg. vacancies, sickness, strikes |                                                 | 19    | 103        |
| Shortage of staff with the necessary skills                |                                                 | 15    | 68         |
| Staff not pulling their weight                             |                                                 | 1     | 3          |
| <u>Wider contextual pressures</u>                          |                                                 | 0     | 0          |
| Organisational pressures                                   | Funding, pressures in other parts of the system | 10    | 29         |

## Supplementary File 2

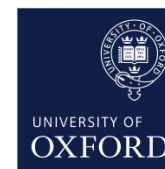

| Name                                                 | Description                                | Files | References |
|------------------------------------------------------|--------------------------------------------|-------|------------|
| Strikes                                              |                                            | 2     | 3          |
| Socio-Economic pressures                             | e.g. Covid pandemic, cost of living crisis | 11    | 19         |
| <u>Problems with system performance</u>              |                                            | 0     | 0          |
| Patients                                             |                                            | 1     | 1          |
| Delays in patients accessing or receiving care       |                                            | 3     | 5          |
| Missed care or errors                                |                                            | 13    | 26         |
| Overcrowding                                         |                                            | 1     | 1          |
| Problems with patient flow                           |                                            | 8     | 18         |
| System and staff                                     |                                            | 2     | 3          |
| Difficulties monitoring the situation                |                                            | 4     | 7          |
| Lack of buffer for ad-hoc requests or unplanned work |                                            | 1     | 1          |

## Supplementary File 2



| Name                                               | Description | Files | References |
|----------------------------------------------------|-------------|-------|------------|
| Problems with cooperation or communication         |             | 10    | 16         |
| <u>Difficult working conditions</u>                |             | 0     | 0          |
| Staff-team dynamics                                |             | 3     | 5          |
| Interpersonal difficulties                         |             | 8     | 19         |
| Lack of support for staff                          |             | 8     | 29         |
| Staff stress or poor wellbeing                     |             | 16    | 58         |
| Team changes                                       |             | 10    | 25         |
| Workload pressures                                 |             | 0     | 0          |
| Difficulties prioritising workload                 |             | 10    | 15         |
| High or increased interruptions                    |             | 6     | 6          |
| High workload, or increased complexity of workload |             | 16    | 63         |

## Supplementary File 2



| Name                                           | Description | Files | References |
|------------------------------------------------|-------------|-------|------------|
| Workload to train and support new nurses       |             | 3     | 4          |
| Time pressures                                 |             | 7     | 11         |
| <b>Strategies</b>                              |             | 0     | 0          |
| <u>Anticipatory strategies</u>                 |             | 0     | 0          |
| <i>Plans for managing workload</i>             |             | 0     | 0          |
| <i>Efficiency strategies</i>                   |             | 5     | 10         |
| Doing tasks ahead of busy time                 |             | 1     | 1          |
| Scheduling to maximise use of limited resource |             | 1     | 1          |
| Use of technology and automated systems        |             | 7     | 14         |
| <i>Forward planning</i>                        |             | 5     | 8          |
| Adapting protocols                             |             | 6     | 15         |

## Supplementary File 2



| Name                                                                     | Description | Files | References |
|--------------------------------------------------------------------------|-------------|-------|------------|
| Anticipatory prioritisation                                              |             | 2     | 2          |
| Contingency planning                                                     |             | 10    | 28         |
| <i>Monitoring or co-ordination strategies</i>                            |             | 2     | 2          |
| Centralised structures for co-ordination                                 |             | 3     | 4          |
| Having an up-to-date knowledge of resources and demand                   |             | 6     | 14         |
| Planned meetings for monitoring the situation and communicating plans    |             | 16    | 43         |
| Getting the nurses to join the doctors on the ward round- query teamwork |             | 1     | 1          |

## Supplementary File 2



| Name                                             | Description | Files | References |
|--------------------------------------------------|-------------|-------|------------|
| <i>Staff support initiatives</i>                 |             | 13    | 30         |
| Support and education for overseas nurses        |             | 4     | 7          |
| <i>Resources vs demand</i>                       |             | 1     | 1          |
| <i>Control demand</i>                            |             | 0     | 0          |
| Discharging or transferring patients             |             | 7     | 21         |
| Suspending or restricting services or procedures |             | 7     | 9          |
| <i>Increase resources available</i>              |             | 1     | 1          |
| Create more space or repurpose space             |             | 5     | 6          |
| Improve skillmix                                 |             | 14    | 34         |
| Support and education for overseas nurses        |             | 5     | 8          |

October 2023

Page 7 of 19

## Supplementary File 2



| Name                                                          | Description | Files | References |
|---------------------------------------------------------------|-------------|-------|------------|
| Increase staff                                                |             | 13    | 29         |
| New job role or new team                                      |             | 2     | 2          |
| Increase supplies                                             |             | 2     | 3          |
| Making managers or politicians aware of pressures             |             | 6     | 11         |
| Open more beds or services                                    |             | 3     | 5          |
|                                                               |             |       |            |
| <u>On-the-day adaptations</u>                                 |             | 7     | 9          |
| <i>Adapting ways of working</i>                               |             | 1     | 1          |
| <i>Communication</i>                                          |             | 13    | 34         |
| Boards for monitoring and communicating (e.g. patient status) |             | 3     | 3          |



## Supplementary File 2



| Name                                                                                                          | Description | Files | References |
|---------------------------------------------------------------------------------------------------------------|-------------|-------|------------|
| Encourage team to document things                                                                             |             | 1     | 1          |
| Increased communication (e.g. additional ad hoc meetings to monitor the situation)                            |             | 7     | 10         |
| More reliance on face-to-face communication and handwritten notes (less reliance on electronic communication) |             | 2     | 2          |
| Other means of quick communication, e.g. WhatsApp groups                                                      |             | 5     | 9          |
| Simplifying information                                                                                       |             | 1     | 2          |
| Communication needs to be clear                                                                               |             | 6     | 9          |
| <i>Leadership</i>                                                                                             |             | 12    | 46         |

## Supplementary File 2



| Name                                                                         | Description | Files | References |
|------------------------------------------------------------------------------|-------------|-------|------------|
| Adjusting and communicating the goals for the system                         |             | 7     | 11         |
| Making decisions based on current information                                |             | 2     | 5          |
| Explaining why something needs doing to staff and pre-empting the next steps |             | 3     | 6          |
| Knowing your team                                                            |             | 12    | 27         |
| Making sure you are aware of your team's skills                              |             | 5     | 5          |
| Leaders spend more time on the 'shop floor'                                  |             | 8     | 17         |
| Learning for next time                                                       |             | 1     | 2          |
| Providing support to staff                                                   |             | 19    | 72         |

## Supplementary File 2



| Name                                                    | Description | Files | References |
|---------------------------------------------------------|-------------|-------|------------|
| Ensuring people have their breaks and don't feel guilty |             | 7     | 9          |
| Helping people feel comfortable about asking for help   |             | 6     | 13         |
| Remaining calm under pressure                           |             | 7     | 12         |
| Stop operations and regain awareness of situation       |             | 1     | 1          |
| Use of networks                                         |             | 7     | 7          |
| <i>Teamwork</i>                                         |             | 1     | 1          |
| Checking mechanisms                                     |             | 4     | 4          |
| Checking work has been done and not just assuming       |             | 2     | 3          |

## Supplementary File 2



| Name                                                                     | Description | Files | References |
|--------------------------------------------------------------------------|-------------|-------|------------|
| Closed loop communication                                                |             | 2     | 3          |
| Clear allocation or adjustments to the allocation of roles               |             | 9     | 14         |
| Collaboration strategies and asking for help from others                 |             | 5     | 6          |
| Ensuring staff don't take too long breaks when busy                      |             | 1     | 1          |
| Getting the nurses to join the doctors on the ward round- query teamwork |             | 1     | 1          |
| Interdisciplinary working                                                |             | 3     | 4          |
| Linking with other units                                                 |             | 3     | 6          |

## Supplementary File 2



| Name                                                                        | Description                      | Files | References |
|-----------------------------------------------------------------------------|----------------------------------|-------|------------|
| Making sure you are aware of your team's skills                             |                                  | 0     | 0          |
| Not having a break                                                          |                                  | 2     | 2          |
| Pre-empting things                                                          |                                  | 1     | 1          |
| Sending outreach to see a patient in A&E to assess whether suitable for ICU |                                  | 1     | 1          |
| Silo working                                                                |                                  | 1     | 1          |
| Speaking up when you don't know                                             |                                  | 1     | 1          |
| Support for less experienced staff                                          |                                  | 2     | 2          |
| Teamwork                                                                    | Strategies relating to team work | 13    | 41         |
| Use of protocols and guidance                                               |                                  | 8     | 16         |

## Supplementary File 2



| Name                                                     | Description | Files | References |
|----------------------------------------------------------|-------------|-------|------------|
| Reflecting at the end of the busy day                    |             | 3     | 5          |
| <i>Flexing the use of resources</i>                      |             | 3     | 4          |
| Use of existing drugs and equipment                      |             | 0     | 0          |
| Borrowing resources from other units                     |             | 0     | 0          |
| Use of similar drugs or equipment                        |             | 1     | 1          |
| Use of existing space and beds                           |             | 4     | 7          |
| Creating temporary holding spaces for patients           |             | 2     | 2          |
| Placing patients or providing care in non-standard areas |             | 0     | 0          |

## Supplementary File 2



| Name                                                                                  | Description | Files | References |
|---------------------------------------------------------------------------------------|-------------|-------|------------|
| Transferring or relocating patients based on need                                     |             | 6     | 15         |
| Change in the use of critical care beds based on patient demand across hospital       |             | 2     | 2          |
| Placing patient in another related unit                                               |             | 1     | 1          |
| Use of existing staff                                                                 |             | 3     | 8          |
| Adjustments to staff-patient ratios                                                   |             | 6     | 7          |
| Flexing staff to address numbers or skill-mix (e.g. reallocating staff between units) |             | 12    | 38         |
| Managerial staff take on clinical roles                                               |             | 6     | 15         |

## Supplementary File 2



| Name                                                       | Description                                                  | Files | References |
|------------------------------------------------------------|--------------------------------------------------------------|-------|------------|
| Education team help on busy days                           |                                                              | 3     | 4          |
| Staff work late                                            |                                                              | 1     | 1          |
| Staff staying late                                         |                                                              | 5     | 9          |
| Task-shifting or extension of responsibilities             |                                                              | 5     | 9          |
| Allocation of staff and task-shifting                      | Strategies relating to how staff are allocated and job roles | 9     | 26         |
| Nurse asking doctor to watch the patient for a few minutes |                                                              | 1     | 1          |
| <i>Prioritising demand</i>                                 |                                                              | 0     | 0          |
| Prioritisation of workload                                 |                                                              | 3     | 4          |
| Prioritisation and reprioritising workload                 |                                                              | 9     | 49         |



## Supplementary File 2



| Name                                                                          | Description                                                                          | Files    | References |
|-------------------------------------------------------------------------------|--------------------------------------------------------------------------------------|----------|------------|
| Prioritisation of workload or tasks                                           |                                                                                      | 7        | 22         |
| Prioritising and reprioritising patients                                      |                                                                                      | 13       | 33         |
| Temporarily stopping some activities or types of care, or delaying till later |                                                                                      | 8        | 15         |
| <b>Education and learning</b>                                                 |                                                                                      | <b>1</b> | <b>1</b>   |
| Education and learning for others                                             | Top tips for others to ensure pressures don't impact on safety and advice for others | 14       | 40         |
| How these strategies are developed                                            | Descriptions of how interviewee learnt or developed the strategies they use          | 0        | 0          |
| Formal teaching                                                               |                                                                                      | 13       | 26         |
| Informal teaching                                                             |                                                                                      | 2        | 2          |
| Learning from experience                                                      |                                                                                      | 16       | 40         |
| Mentoring or coaching                                                         |                                                                                      | 6        | 11         |

## Supplementary File 2



| Name                                          | Description                                          | Files | References |
|-----------------------------------------------|------------------------------------------------------|-------|------------|
| Other                                         |                                                      | 5     | 12         |
| Seeing what others are doing                  |                                                      | 10    | 12         |
| Simulation                                    |                                                      | 3     | 5          |
| How to teach these strategies                 | Thoughts and advice on how to teach these strategies | 4     | 6          |
| Bed-side teaching                             |                                                      | 4     | 8          |
| Formal teaching                               |                                                      | 4     | 8          |
| Mentoring or coaching                         |                                                      | 4     | 8          |
| Other                                         |                                                      | 5     | 8          |
| Protocols                                     |                                                      | 3     | 5          |
| Simulation and scenario-based                 |                                                      | 5     | 19         |
| <b>Impact</b>                                 |                                                      | 0     | 0          |
| Impacts of pressures on patients and families |                                                      | 15    | 45         |
| Impacts of pressures on staff                 |                                                      | 15    | 42         |

## Supplementary File 2



| Name                                     | Description                                                                                                     | Files | References |
|------------------------------------------|-----------------------------------------------------------------------------------------------------------------|-------|------------|
| Impacts of pressures on the wider system | This includes impacts on safety, impacts on other parts of the health system such as A&E, surgery or discharges | 10    | 18         |
| <b>Main objective</b>                    |                                                                                                                 | 17    | 28         |
| <b>Sage advice</b>                       |                                                                                                                 | 12    | 23         |
| Leave personal issues at home            |                                                                                                                 | 1     | 1          |
| Useful vignettes on pressures            |                                                                                                                 | 7     | 12         |
